# Supplementary material
Source: ML conference proceedings conference paper supplement (https://proceedings.mlr.press/v189/ma23b.html)
Supplement: Supplementary file [file ma23b-supp.pdf]

# Supplemental Material for *Asynchronous Personalized Federated Learning with Irregular Clients*

**Editors:** Emtiyaz Khan and Mehmet Gonen

## 1. Complete Proofs

### 1.1. Proof of Theorem 1

Suppose the virtual sequence of global models  $\bar{\omega}^\tau$  for  $\tau = 1, 2, \dots, T$  is computed by

$$\bar{\omega}^\tau = \omega^0 - \sum_{l=1}^M p^l \sum_{i=0}^{\tau-1} \eta_i \nabla F_k(\omega_k^i, \xi_k^i). \quad (9)$$

We define  $g^\tau = \sum_{k=1}^M p^k \nabla F_k(\omega_k^\tau, \xi_k^\tau)$  and  $\bar{g}^\tau = \sum_{k=1}^M p^k \nabla F_k(\omega_k^\tau)$ , and we have  $\mathbb{E}[g^\tau] = \bar{g}^\tau$ . Consequently, based on Equation 2, we have  $\bar{\omega}^{\tau+1} = \bar{\omega}^\tau - \eta_\tau g^\tau$ . Then it holds that

$$\begin{aligned} \|\bar{\omega}^{\tau+1} - \omega^*\|^2 &= \|\bar{\omega}^\tau - \eta_\tau g^\tau - \omega^*\|^2 \\ &= \|\bar{\omega}^\tau - \eta_\tau g^\tau - \omega^* - \eta_\tau \bar{g}^\tau + \eta_\tau \bar{g}^\tau\|^2 \\ &= \|\bar{\omega}^\tau - \omega^* - \eta_\tau \bar{g}^\tau + \eta_\tau (\bar{g}^\tau - g^\tau)\|^2 \\ &= \underbrace{\|\bar{\omega}^\tau - \omega^* - \eta_\tau \bar{g}^\tau\|^2}_{A_1} + \underbrace{\eta_\tau^2 \|\bar{g}^\tau - g^\tau\|^2}_{A_2} + \underbrace{2\eta_\tau \langle \bar{\omega}^\tau - \omega^* - \eta_\tau \bar{g}^\tau, \bar{g}^\tau - g^\tau \rangle}_{A_3}. \end{aligned} \quad (10)$$

To bound Equation (10), we separately bound  $A_1$ ,  $A_2$  and  $A_3$ .

$$A_1 = \|\bar{\omega}^\tau - \omega^*\|^2 + \underbrace{\eta_\tau^2 \|\bar{g}^\tau\|^2}_{B_1} - \underbrace{2\eta_\tau \langle \bar{\omega}^\tau - \omega^*, \bar{g}^\tau \rangle}_{B_2}. \quad (11)$$

Given Assumption 1, for any  $\omega$  and  $\omega'$ , we have

$$\begin{aligned} F(\omega) &= F(\omega') + \int_0^1 \frac{dF(\omega' + t(\omega - \omega'))}{dt} dt \\ &= F(\omega') + \int_0^1 \nabla F(\omega' + t(\omega - \omega'))^\top (\omega - \omega') dt \\ &= F(\omega') + \nabla F(\omega')^\top (\omega - \omega') + \int_0^1 [\nabla F(\omega' + t(\omega - \omega')) - \nabla F(\omega')]^\top (\omega - \omega') dt \quad (12) \\ &\leq F(\omega') + \nabla F(\omega')^\top (\omega - \omega') + \int_0^1 L |t(\omega - \omega')| \|\omega - \omega'\| dt \\ &= F(\omega') + \nabla F(\omega')^\top (\omega - \omega') + \frac{1}{2} L \|\omega - \omega'\|^2, \end{aligned}$$

and

$$\|\nabla F_k(\omega_k^\tau)\|^2 \leq 2L(F_k(\omega_k^\tau) - F_k(\omega^*)). \quad (13)$$

Thus,  $B_1$  is bounded by

$$B_1 \leq \eta_\tau^2 \sum_{k=1}^M p^k \|\nabla F_k(\omega_k^\tau)\|^2 \leq 2L\eta_\tau^2 \sum_{k=1}^M p^k (F_k(\omega_k^\tau) - F_k(\omega^*)). \quad (14)$$

$B_2$  can be reformulated by

$$\begin{aligned} B_2 &= -2\eta_\tau \sum_{k=1}^M p^k \langle \bar{\omega}^\tau - \omega^*, g_k^\tau \rangle \\ &= -2\eta_\tau \sum_{k=1}^M p^k \langle \bar{\omega}^\tau - \omega_k^\tau, g_k^\tau \rangle - 2\eta_\tau \sum_{k=1}^M p^k \langle \omega_k^\tau - \omega^*, g_k^\tau \rangle, \end{aligned} \quad (15)$$

and we have

$$\begin{aligned} -2\mathbb{E}[\langle \bar{\omega}^\tau - \omega_k^\tau, g_k^\tau \rangle] &= -2 \langle \bar{\omega}^\tau - \omega_k^\tau, \nabla F_k(\omega_k^\tau) \rangle \\ &\leq 2\|\bar{\omega}^\tau - \omega_k^\tau\| \|\nabla F_k(\omega_k^\tau)\| \\ &\leq \frac{1}{\eta_\tau} \|\bar{\omega}^\tau - \omega_k^\tau\|^2 + \eta_\tau \|\nabla F_k(\omega_k^\tau)\|^2. \end{aligned} \quad (16)$$

The first inequality holds for Cauchy-Schwarz inequality and the second holds for AM-GM inequality. According to Equations (13) and (16), we have

$$-2\mathbb{E}[\langle \bar{\omega}^\tau - \omega_k^\tau, g_k^\tau \rangle] \leq \frac{1}{\eta_\tau} \|\bar{\omega}^\tau - \omega_k^\tau\|^2 + 2L\eta_\tau (F_k(\omega_k^\tau) - F_k(\omega^*)), \quad (17)$$

and

$$-2\mathbb{E}[\langle \omega_k^\tau - \omega^*, g_k^\tau \rangle] \leq -2(F_k(\omega_k^\tau) - F_k(\omega^*)) - \mu \|\omega_k^\tau - \omega^*\|^2. \quad (18)$$

Thus,  $B_2$  can be bounded by

$$\mathbb{E}[B_2] \leq \sum_{k=1}^M p^k (\|\bar{\omega}^\tau - \omega_k^\tau\|^2 + 2L\eta_\tau^2 (F_k(\omega_k^\tau) - F_k(\omega^*))) - \eta_\tau \sum_{k=1}^M p^k (2(F_k(\omega_k^\tau) - F_k(\omega^*)) + \mu \|\omega_k^\tau - \omega^*\|^2). \quad (19)$$

According to the convexity property of quadratic function, we have

$$-\eta_\tau \mu \sum_{k=1}^M p^k \|\omega_k^\tau - \omega^*\|^2 \leq -\eta_\tau \mu \|\bar{\omega}^\tau - \omega^*\|^2. \quad (20)$$

Substituting Equation (20) into Equation (19), we bound  $B_2$  by

$$\mathbb{E}[B_2] \leq \sum_{k=1}^M p^k (\|\bar{\omega}^\tau - \omega_k^\tau\|^2 + 2L\eta_\tau^2 (F_k(\omega_k^\tau) - F_k(\omega^*))) - 2\eta_\tau \sum_{k=1}^M p^k (F_k(\omega_k^\tau) - F_k(\omega^*)) - \eta_\tau \mu \|\bar{\omega}^\tau - \omega^*\|^2. \quad (21)$$

Based on Equations (14) and (21),  $A_1$  can be reformulated as

$$\begin{aligned} \mathbb{E}[A_1] &\leq (1 - \eta_\tau \mu) \|\bar{\omega}^\tau - \omega^*\|^2 + \sum_{k=1}^M p^k \|\bar{\omega}^\tau - \omega_k^\tau\|^2 \\ &\quad + \underbrace{4L\eta_\tau^2 \sum_{k=1}^M p^k (F_k(\omega_k^\tau) - F_k^*) - 2\eta_\tau \sum_{k=1}^M p^k (F_k(\omega_k^\tau) - F_k(\omega^*))}_{C}. \end{aligned} \quad (22)$$

Let  $\gamma_\tau = 2\eta_\tau(1 - 2L\eta_\tau)$  for  $\tau = 1, 2, \dots, T$ .  $C$  can be reformulated as

$$\begin{aligned} C &= -\gamma_\tau \sum_{k=1}^M p^k (F_k(\omega_k^\tau) - F(\omega^*)) + (2\eta_\tau - \gamma_\tau) \sum_{k=1}^M p^k (F^* - F_k^*) \\ &= -\gamma_\tau \underbrace{\sum_{k=1}^M p^k (F_k(\omega_k^\tau) - F^*)}_{D} + 4L\eta_\tau^2 \Gamma, \end{aligned} \quad (23)$$

where

$$\begin{aligned} D &= \sum_{k=1}^M p^k (F_k(\omega_k^\tau) - F(\bar{\omega}^\tau)) + \sum_{k=1}^M p^k (F_k(\bar{\omega}^\tau) - F^*) \\ &\geq \underbrace{\sum_{k=1}^M p^k \langle \nabla F_k(\bar{\omega}^\tau), \bar{\omega}_k^\tau - \bar{\omega}^\tau \rangle + F(\bar{\omega}^\tau) - F^*}_{D_1}. \end{aligned} \quad (24)$$

Given Assumption 1, we have

$$D_1 \geq -\frac{1}{2} \sum_{k=1}^M p^k (\eta_\tau \|\nabla F_k(\bar{\omega}^\tau)\|^2 + \frac{1}{\eta_\tau} \|\omega_k^\tau - \bar{\omega}^\tau\|^2). \quad (25)$$

Substituting Equations (25) and (24) into (23), we have

$$\begin{aligned} C &= \gamma_\tau (L\eta_\tau - 1) \sum_{k=1}^M p^k (F_k(\omega_k^\tau) - F_k(\omega^*)) + (4L\eta_\tau^2 + \gamma_\tau \eta_\tau L) \Gamma + \frac{\gamma_\tau}{2\eta_\tau} \sum_{k=1}^M p^k \|\bar{\omega}^\tau - \omega_k^\tau\|^2 \\ &\leq 6L\eta_\tau^2 \Gamma + \sum_{k=1}^M p^k \|\bar{\omega}^\tau - \omega_k^\tau\|^2. \end{aligned} \quad (26)$$

According to Equations (22) and (26),  $A_1$  can be bounded by

$$\mathbb{E}[A_1] \leq (1 - \mu\eta_\tau) \|\bar{\omega}^\tau - \omega^*\|^2 + 2 \underbrace{\sum_{k=1}^M p^k \|\bar{\omega}^\tau - \omega_k^\tau\|^2}_{D_2} + 6L\eta_\tau^2 \Gamma. \quad (27)$$

To bound  $D_2$ , we define the auxiliary inequality as

$$\begin{aligned}
g_k^{\tau+1} &= \|g_k^{\tau+1} - g_k^\tau + g_k^\tau\| \leq \|g_k^{\tau+1} - g_k^\tau\| + \|g_k^\tau\| \\
&= \|\nabla F_k(\omega_K^\tau - \eta_\tau g_k^\tau) - \nabla F_k(\omega_K^\tau)\| + \|g_k^\tau\| \\
&\leq L\|\omega_K^\tau - \eta_\tau g_k^\tau - \omega_K^\tau\| + \|g_k^\tau\| \\
&= (1 + L\eta_\tau)\|g_k^\tau\| = (1 + L\eta_\tau)^\tau \|g_k^0\|,
\end{aligned} \tag{28}$$

and  $\tau_{k_0}$  as the last time step when  $k$ -th client upload its model to the server. Given the fixed  $\eta$ , we have

$$\begin{aligned}
\|\bar{\omega}^\tau - \omega_k^\tau\| &= \|(\omega_k^\tau - \omega^{\tau_{k_0}}) - (\bar{\omega}^\tau - \omega^{\tau_{k_0}})\| \leq \sum_{i=\tau_{k_0}}^{\tau} \|\eta(g_k^i - \sum_{j=1}^M p^j g_j^i)\| \\
&\leq \sum_{i=\tau_{k_0}}^{\tau} (1 + L\eta)^{i-\tau_{k_0}} \|\eta(g_k^{\tau_{k_0}} - \sum_{j=1}^M g_j^{\tau_{k_0}})\| \\
&\leq \left\| \frac{\sum_{i=\tau_{k_0}}^{\tau} (1 + L\eta)^{i-\tau_{k_0}} - 1}{L} (g_k^{\tau_{k_0}} - \sum_{j=1}^M g_j^{\tau_{k_0}}) \right\|.
\end{aligned} \tag{29}$$

Equation (29) can be reformulated as

$$\|\bar{\omega}^\tau - \omega_k^\tau\| \leq \left\| \frac{\sum_{i=\tau_{k_0}}^{\tau} (1 + L\eta)^{\pi_k E - 1}}{L} (g_k^{\tau_{k_0}} - \sum_{j=1}^M g_j^{\tau_{k_0}}) \right\|. \tag{30}$$

Given Assumption 4, we have

$$\|\bar{\omega}^\tau - \omega_k^\tau\| \leq \left\| \frac{\sum_{i=\tau_{k_0}}^{\tau} (1 + L\eta)^{i-\tau_{k_0}} - 1}{L} (g_k^{\tau_{k_0}} - \sum_{j=1}^M g_j^{\tau_{k_0}}) \right\|, \tag{31}$$

and according to Taylor expansion,

$$\|\bar{\omega}^\tau - \omega_k^\tau\| \leq \eta^2 (\pi_k E - 1)^2 \chi^2 \leq \eta^2 E (\pi_k^2 E - \pi_k) \chi^2. \tag{32}$$

Thus,  $D_2$  can be bounded by

$$D_2 \leq 2\eta_\tau^2 E \sum_{k=1}^M p^k (\pi_k^2 E - \pi_k) \chi^2. \tag{33}$$

Substituting Equation (33) into (27),  $A_1$  can be bounded by

$$\mathbb{E}[A_1] \leq (1 - \mu\eta_\tau) \|\bar{\omega}^\tau - \omega^*\|^2 + 2\eta_\tau^2 E \sum_{k=1}^M p^k (\pi_k^2 E - \pi_k) \chi^2 + 6L\eta_\tau^2 \Gamma. \tag{34}$$

Then,  $A_2 = \eta_\tau^2 \|\bar{g}^\tau - g^\tau\|^2$  in Equation (10) can be bounded by

$$\begin{aligned}
\mathbb{E}[\|g^\tau - \bar{g}^\tau\|^2] &= \mathbb{E}[\|\sum_{k=1}^M p^k (\nabla F_k(\omega_k^\tau) - g_k^\tau)\|^2] \\
&\leq \sum_{k=1}^M p^{2k} \mathbb{E}[\|\nabla F_k(\omega_k^\tau) - g_k^\tau\|^2] \leq \sum_{k=1}^M p^{2k} \sigma_k^2,
\end{aligned} \tag{35}$$

and  $A_3 = 2\eta_\tau \langle \bar{\omega}^\tau - \omega^* - \eta_\tau \bar{g}^\tau, \bar{g}^\tau - g^\tau \rangle$  can be bounded by  $\mathbb{E}[A_3] = 0$  for  $\mathbb{E}[g^\tau] = \bar{g}^\tau$ .

Let  $\Delta_{\tau+1} = \mathbb{E}[\|\bar{\omega}^{\tau+1} - \omega^*\|^2]$  and combining the obtained bounds of  $A_1$ ,  $A_2$  and  $A_3$ , we have

$$\Delta_{\tau+1} \leq (1 - \mu\eta_\tau)\Delta_\tau + \eta_\tau^2 A', \quad (36)$$

where  $A' = \sum_{k=1}^M p^{2k} \sigma_k^2 + 6L\Gamma + 2E \sum_{k=1}^M p^k (\pi_k^2 E - \pi_k) \chi^2$ . Equation (36) can be further reformulated as

$$\Delta_{\tau+1} - \frac{\eta_\tau A'}{\mu} \leq (1 - \mu\eta_\tau) \left( \Delta_\tau - \frac{\eta_\tau A'}{\mu} \right). \quad (37)$$

Thus we have

$$\Delta_{\tau+1} - \frac{\eta A'}{\mu} \leq (1 - \mu\eta)^{\tau+1} \left( \Delta_0 - \frac{\eta A'}{\mu} \right). \quad (38)$$

Given Assumption 1, the convergence bound of AsyPFL with fixed learning rate is

$$\mathbb{E}[F(\bar{\omega}^\tau)] - F^* \leq \frac{L}{2} \Delta_\tau. \quad (39)$$

## 1.2. Proof of Theorem 2

The proof of Theorem 2 follows from the proof of Theorem 1. Starting from inequality (28), using the decayed learning rate in  $D_2$ , we have

$$\begin{aligned} \|\bar{\omega}^\tau - \omega_k^\tau\| &= \|(\omega_k^\tau - \omega^{\tau_{k_0}}) - (\bar{\omega}^\tau - \omega^{\tau_{k_0}})\| \leq \sum_{i=\tau_{k_0}}^{\tau} \|\eta_\tau (g_k^i - \sum_{j=1}^M g_j^i)\| \\ &\leq \left\| \frac{(1 + L\eta_{\tau_{k_0}})^{\pi_k E - 1} - 1}{L} (g_k^{\tau_{k_0}} - \sum_{j=1}^M g_j^{\tau_{k_0}}) \right\|. \end{aligned} \quad (40)$$

Given Assumption 4, we have

$$\|\bar{\omega}^\tau - \omega_k^\tau\|^2 \leq \left( \frac{(1 + L\eta_{\tau_{k_0}})^{\pi_k E - 1} - 1}{L} \right)^2 \chi^2. \quad (41)$$

According to the Taylor expansion, Equation (41) can be reformulated as

$$\|\bar{\omega}^\tau - \omega_k^\tau\|^2 \leq 4\eta_\tau^2 (\pi_k E - 1)^2 \chi^2 \leq 4\eta_\tau^2 E (\pi_k^2 E - \pi_k) \chi^2. \quad (42)$$

Thus  $D_2$  can be bounded by

$$D_2 \leq 8\eta_\tau^2 E \sum_{k=1}^M p^k (\pi_k^2 E - \pi_k) \chi^2. \quad (43)$$

Substituting the bound of  $D_2$  into Equation (34), we have

$$\Delta_{\tau+1} \leq (1 - \mu\eta_\tau)\Delta_\tau + \eta_\tau^2 A'. \quad (44)$$

### 1.3. Proof of Theorem 3

Suppose the error bound of AsyPFL satisfies

$$\mathbb{E}[\omega^{T_{\min}}] - F^* \leq \frac{2L}{\mu(\gamma + T_{\min})^{2/3}} \left( \frac{A}{\mu} + 2L\|\omega^0 - \omega^*\| \right) \leq \epsilon. \quad (45)$$

Equation (45) can be reformulated as

$$T_{\min} + \gamma \geq \frac{2L}{\mu\epsilon} \left( \frac{A}{\mu} + 2L\|\omega^0 - \omega^*\| \right), \quad (46)$$

which is equivalent to

$$T_{\min} \geq \frac{2L}{\mu\epsilon} \left( \frac{\sum_{k=1}^M p^{2k} \sigma_k^2 + 6L\Gamma}{\mu} + 2L\|\omega^0 - \omega^*\| \right) + \frac{16L}{\mu^2\epsilon} E \sum_{k=1}^M p^k (\pi_k^2 E - \pi_k) \chi^2 - \gamma. \quad (47)$$

Thus, the required communication rounds are

$$R_{\min}(E) = \frac{T_{\min}}{E} \geq \frac{2L}{E\mu\epsilon} \left( \frac{\sum_{k=1}^M p^{2k} \sigma_k^2 + 6L\Gamma}{\mu} + 2L\|\omega^0 - \omega^*\| \right) + \frac{16L}{\mu^2\epsilon} \sum_{k=1}^M p^k (\pi_k^2 E - \pi_k) \chi^2 - \gamma. \quad (48)$$

According to Equation (48), we define the required communication rounds as a function of local epochs  $E$  by

$$R(E) = \left( \frac{16L}{\epsilon\mu^2} \chi^2 \sum_{k=1}^M p^k \pi_k^2 \right) E + \frac{V_\epsilon + \frac{4L^2}{\epsilon\mu} \|\omega^0 - \omega^*\|}{E} - \left( \frac{16L}{\epsilon\mu^2} \sum_{k=1}^M p^k \pi_k \chi^2 + \gamma \right), \quad (49)$$

which is in the form of

$$R(E) = aE + \frac{b}{E} - c. \quad (50)$$

Taking the derivative w.r.t.  $E$  and let the resulting function equal to zero, we have

$$\frac{dR(E)}{dE} = a - \frac{b}{E^2} = 0, \quad (51)$$

and  $E = \sqrt{\frac{b}{a}}$ .

### 1.4. Proof of Theorem 4

$\Delta T$  is minimized if  $C_{\pi_k}$  achieves its minimum. Thus, according to the definition of  $C_{\pi_k}$  and equation (47), we have

$$C_{\pi_k} = \Delta T_k^g Z_k + \frac{16L}{\epsilon\mu^2} \Delta T_k^g \chi^2 p^k (E\pi_k)^2 + \Delta T_k^c \frac{Z_k}{E\pi_k} - \frac{16L}{\epsilon\mu^2} \Delta T_k^c \chi^2 p^k. \quad (52)$$

Taking the derivative w.r.t.  $\pi_k$  and let the resulting equation equal to zero, we have

$$2 \frac{\Delta T_k^g}{\Delta T_k^c} \frac{16L}{\epsilon\mu^2} E^2 \chi^2 p^k \pi_k = \frac{Z_k}{E\pi_k^2}. \quad (53)$$

Rearranging Equation (53) to obtain the result in Theorem 4.
